# Supplementary material for: Therapeutic Efficacy of Flavonoids in Allergies: A Systematic Review of Randomized Controlled Trials
Source: Hindawi journal article supplement (doi:10.1155/2022/8191253), 2022-04-13
Supplement: f1 [file 8191253.f1.pdf]

Table 1S. Search strategy carried out on PubMed, Scopus, Web of Science and Embase databases.

| <b>DATABASE</b> | <b>DESCRIPTOR</b>                                                                                                                                                                                                                                                                                                                                                                                                                                                                                                                                                                                                                                                                                                                           | <b>RESULTS</b> | <b>DATA/TIME</b>    |
|-----------------|---------------------------------------------------------------------------------------------------------------------------------------------------------------------------------------------------------------------------------------------------------------------------------------------------------------------------------------------------------------------------------------------------------------------------------------------------------------------------------------------------------------------------------------------------------------------------------------------------------------------------------------------------------------------------------------------------------------------------------------------|----------------|---------------------|
| PubMed          | ("hypersensitivity"[MeSH Terms] OR "hypersensitivity"[TIAB] OR "allergy and immunology"[MeSH Terms] OR "allergy and immunology"[TIAB] OR "allergy"[TIAB]) AND ("flavonoids"[MeSH Terms] OR "flavonoids"[TIAB] OR "quercetin"[MeSH Terms] OR "quercetin"[TIAB]) AND ("clinical trial"[MeSH Terms] OR "clinical trial"[TIAB] OR "controlled clinical trial"[MeSH Terms] OR "controlled clinical trial"[TIAB] OR "multicenter study"[MeSH Terms] OR "multicenter study"[TIAB] OR "randomized controlled trial"[MeSH Terms] OR "randomized controlled trial"[TIAB] OR "randomized controlled trials as topic"[MeSH Terms] OR "randomized controlled trials as topic"[TIAB] OR "double-blind method"[MeSH Terms] OR "double-blind method"[TIAB]) | 39             | 09/01/2021<br>20h15 |
| Scopus          | TITLE-ABS-KEY ( ( hypersensitivity OR allergy AND immunology ) AND ( flavonoids OR quercetin ) ) AND ( LIMIT-TO ( DOCTYPE , "ar" ) ) AND ( EXCLUDE ( EXACTKEYWORD , "Animals" ) OR EXCLUDE ( EXACTKEYWORD , "Animal" ) OR EXCLUDE ( EXACTKEYWORD , "Mouse" ) OR EXCLUDE ( EXACTKEYWORD , "Mice" ) )                                                                                                                                                                                                                                                                                                                                                                                                                                         | 27             | 09/01/2021<br>19h44 |
| Web of Science  | TOPIC: (hypersensitivity OR (allergy and immunology) OR allergy) AND TOPIC: (flavonoids OR quercetin) AND TOPIC: (clinical trial OR controlled clinical trial OR multicenter study OR multirandomized controlled trial OR randomized controlled trials as topic OR double-blind method)<br>Refined by: DOCUMENT TYPES: ( ARTICLE )                                                                                                                                                                                                                                                                                                                                                                                                          | 12             | 09/01/2021<br>23h50 |
| Embase          | (hypersensitivity OR (allergy AND immunology) OR allergy) AND (flavonoids OR quercetin) AND [randomized controlled trial]/lim                                                                                                                                                                                                                                                                                                                                                                                                                                                                                                                                                                                                               | 19             | 09/01/2021<br>20h16 |
